# Supplementary material
Source: PubMed Central journal article supplement (PMC4143464)
Supplement: NIHMS577063-supplement-supplement_1.pdf [file NIHMS577063-supplement-supplement_1.pdf]

**Supplementary Table:** Measuring outcomes after prostate cancer treatment. We only assessed treatment-related morbidity that required a procedure because diagnosis codes alone lack specificity.<sup>30</sup> To minimize the misclassification of pre-existing conditions as treatment-related morbidity, we excluded patients with claims for the index morbidity in the 12 months prior to treatment.

| Outcome                                                                                                                                                            | HCPCS code                                                                                                                                                                                                                                                                                                                                                                                                                                                                          | ICD-9 codes                                                                                                                                                                                                                                                                                                                                                                                                                                                                                                                                                                                                                                                                                                                                                                                                                                                                                                                                                                                                                                                                                                                                                                                                                                                                                                    |
|--------------------------------------------------------------------------------------------------------------------------------------------------------------------|-------------------------------------------------------------------------------------------------------------------------------------------------------------------------------------------------------------------------------------------------------------------------------------------------------------------------------------------------------------------------------------------------------------------------------------------------------------------------------------|----------------------------------------------------------------------------------------------------------------------------------------------------------------------------------------------------------------------------------------------------------------------------------------------------------------------------------------------------------------------------------------------------------------------------------------------------------------------------------------------------------------------------------------------------------------------------------------------------------------------------------------------------------------------------------------------------------------------------------------------------------------------------------------------------------------------------------------------------------------------------------------------------------------------------------------------------------------------------------------------------------------------------------------------------------------------------------------------------------------------------------------------------------------------------------------------------------------------------------------------------------------------------------------------------------------|
| Perioperative complications within 30 days of surgery (e.g., myocardial infarction, respiratory failure, stroke, bowel or ureteral injury, or wound complications) | 26990, 44125, 44140, 44141, 44143, 44144, 44145, 44146, 44147, 44160, 44202, 44204, 44205, 44206, 44207, 44208, 44227, 44310, 44320, 44320, 44602, 44603, 44604, 44605, 45020, 45111, 45112, 45150, 44120, 45562, 45563, 49060, 49061, 50040, 50120, 50125, 50392, 50393, 50394, 50395, 50398, 50600, 50605, 50700, 50715, 50760, 50770, 50780, 50782, 50783, 50785, 50800, 50810, 50815, 50820, 50825, 50840, 50900, 50940, 50970, 50972, 51080, 52290, 52332, 52334, 52335, 58823 | Diagnosis codes:<br>3301, 3491, 40201 40211, 40291, 410, 4100, 41000, 41001, 41002, 4101, 41010, 41011, 41012, 4102, 41020, 41021, 41022, 4103, 41030, 41031, 41032, 4104, 41040, 41041, 41042, 4105, 41050, 41051, 41052, 4106, 41060, 41061, 41062, 4107, 41070, 41071, 41072, 4108, 41080, 41081 41082, 4109, 41090, 41091, 41092, 4275, 428, 4280, 4281, 4282, 42820, 42821, 42822, 42823, 4283, 42830, 42831, 42832, 42833, 4284, 42840, 42841, 42842, 42843, 4289, 43311, 43321, 43331, 43381, 43391, 43401, 43411, 436, 44422, 44481, 4512, 45181, 4519, 4539, 466, 4660, 4661, 46611, 46619, 480, 4800, 4801, 4802, 4803, 4808, 4809, 481, 482, 4820, 4821, 4822, 4823, 48230, 48231, 48232, 48239, 4824, 48240, 48241, 48242, 48249, 4828, 48281, 48282, 48283, 48284, 48289, 4829, 483, 4831, 4838, 485, 486, 514, 5180, 5184, 5185, 51851, 51852, 51853, 51881, 58182, 7991, 830, 9971, 9972, 9973, 99731, 99732, 99739, 9992<br>Procedure codes:<br>4601, 4603, 4604, 4610, 4611, 4614, 4620, 4621, 4624, 484, 4841, 4849, 485, 486, 4861, 4862, 4863, 4864, 4865, 4869, 487, 4871, 4872, 4873, 4874, 4875, 4876, 4879, 4891, 4892, 4893, 4899, 540, 5411, 5412, 5419, 5461, 5462, 5491, 5502, 5503, 5512, 5593, 5594, 561, 5641, 5674, 5675, 5681, 5684, 5686, 5689, 5691, 5919, 5993, 9761, 9762 |

| Outcome                                                                                                        | HCPCS code                                                                                                                                                                                                                                                                                                                                                                                                                                                                                                                                                                                                                                    | ICD-9 codes                                                                                                                                                                                                                                                                                                                                                                             |
|----------------------------------------------------------------------------------------------------------------|-----------------------------------------------------------------------------------------------------------------------------------------------------------------------------------------------------------------------------------------------------------------------------------------------------------------------------------------------------------------------------------------------------------------------------------------------------------------------------------------------------------------------------------------------------------------------------------------------------------------------------------------------|-----------------------------------------------------------------------------------------------------------------------------------------------------------------------------------------------------------------------------------------------------------------------------------------------------------------------------------------------------------------------------------------|
| Treatment-related morbidity                                                                                    |                                                                                                                                                                                                                                                                                                                                                                                                                                                                                                                                                                                                                                               |                                                                                                                                                                                                                                                                                                                                                                                         |
| Urinary morbidity (e.g., strictures, urinary obstruction, urinary retention, procedures to treat incontinence) | 11950, 11951, 11952, 11954, 44660, 44661, 45800, 50040, 50120, 50125, 50392, 50393, 50394, 50395, 50398, 50605, 50700, 50715, 50760, 50770, 50780, 50782, 50783, 50785, 50800, 50810, 50815, 50820, 50825, 50840, 51010, 51040, 51102, 51700, 51715, 51840, 51841, 51990, 51992, 52001, 52214, 52275, 52276, 52277, 52281, 52282, 52283, 52290, 52450, 52500, 52510, 52601, 52612, 52614, 52620, 52630, 52647, 52648, 53000, 53010, 53400, 53405, 53410, 53415, 53420, 53425, 53431, 53440, 53442, 53443, 53444, 53445, 53447, 53448, 53449, 53520, 53600, 53601, 53605, 53620, 53621, 53850, 53852, 53853, 57288, C1815, C2631, L8603, L8606 | Procedure codes:<br>5502, 5503, 5512, 5593, 5594, 561, 5641, 5674, 5675, 5681, 5684, 5686, 5689, 5691, 570, 5717, 5718, 5719, 572, 5721, 5722, 5784, 5785, 5789, 5791, 5792, 5793, 5794, 5795, 580, 581, 5831, 5839, 5843, 5844, 5846, 5847, 585, 586, 5893, 5899, 593, 594, 595, 596, 597, 5971, 5972, 5979, 5993, 5994, 602, 6021, 6029, 6095, 6096, 6097, 9761, 9762                 |
| Sexual morbidity (e.g., penile prosthesis implantation, intracavernosal injections)                            | 54231, 54235, 54400, 54401, 54402, 54405, 54407, 54408, 54409, 54410, 54411, 54415, 54416, 54417, C1007, C1813, C2622, C3500, C8514, C8516, C8534, J0270, J0275, J2440, J2760, L7900                                                                                                                                                                                                                                                                                                                                                                                                                                                          | Procedure codes:<br>6494, 6495, 6496, 6497                                                                                                                                                                                                                                                                                                                                              |
| Gastrointestinal morbidity (e.g., endoscopy with procedure, biopsies, resections)                              | 44140, 44141, 44143, 44144, 44145, 44146, 44147, 44150, 44151, 44152, 44153, 44155, 44156, 44160, 44204, 44205, 44206, 44207, 44208, 44210, 44211, 44212, 45000, 45005, 45020, 45110, 45111, 45112, 45113, 45114, 45116, 45119, 45123, 45150, 45300, 45303, 45305, 45317, 45321, 45327, 45331, 45334, 45335, 45337, 45340, 45341, 45342, 45345, 45380, 45380, 45381, 45382, 45386, 45387, 45391, 45392, 45395, 45397, 45500, 45562, 45563, 45805, 45820, 45825, 45905, 45910, 46270, 46275, 46280, 46285, 46604, 46606, 46614, 46700, 46706                                                                                                   | Procedure codes:<br>4525, 4603, 4610, 4611, 4613, 4614, 4823, 4824, 4829, 4831, 4832, 4833, 4835, 484, 4841, 4842, 4843, 4849, 485, 4850, 4851, 4852, 4859, 486, 4861, 4862, 4863, 4864, 4865, 4869, 487, 4871, 4872, 4873, 4874, 4875, 4876, 4879, 489, 4891, 4893, 4899, 491, 4911, 4912, 492, 4922, 4923, 4929, 496, 497, 4971, 4972, 4973, 4974, 4975, 4976, 4979, 5783, 9622, 9623 |
|                                                                                                                |                                                                                                                                                                                                                                                                                                                                                                                                                                                                                                                                                                                                                                               |                                                                                                                                                                                                                                                                                                                                                                                         |

| <b>Outcome</b>                                                          | <b>HCPCS code</b>                                                                                                                                                                                                                            | <b>ICD-9 codes</b>                               |
|-------------------------------------------------------------------------|----------------------------------------------------------------------------------------------------------------------------------------------------------------------------------------------------------------------------------------------|--------------------------------------------------|
| <b>Secondary cancer therapy</b>                                         |                                                                                                                                                                                                                                              |                                                  |
| Use of radiotherapy after prostatectomy                                 | 0073T, 77373, 77380, 77381, 77401, 77402, 77403, 77404, 77406, 77407, 77408, 77409, 77411, 77412, 77413, 77414, 77416, 77417, 77418, 77419, 77420, 77421, 77425, 77427, 77430, 77431, 77435, 77470, 77499, 77520, 77522, 77523, 77525, G0174 | Procedure codes:<br>9221, 9222, 9224, 9233, V580 |
| Use of androgen deprivation therapy after prostatectomy or radiotherapy | 11980, 11981, 11982, 11983, 54520, 96400, 96402, C9216, C9430, G0356, J0128, J0970, J1000, J1056, J1380, J1390, J1410, J1675, J1950, J3315, J9155, J9165, J9202, J9217, J9218, J9219, J9225, J9226, Q2020, S0133, S0165, S9560               | Procedure codes:<br>623, 624, 6241, 6242, 9924   |
